# Supplementary material for: Assembly of SnO2quantum dots on RGO to form SnO2/N doped RGO as a high-capacity anode material for lithium ion batteries
Source: Royal Society of Chemistry journal article supplement (doi:10.1039/c4ce02315c), 2015-01-01
Supplement: c4ce02315c1.pdf [file c4ce02315c1.pdf]

## **Assembling of SnO<sub>2</sub> Quantum dots on RGO to form SnO<sub>2</sub>/N doped RGO as High-Capacity Anode Material for Lithium Ion Batteries**

**Yunqing Luo,<sup>1\*</sup> Shanshan Fan,<sup>1</sup> Yumin Luo,<sup>2</sup> Nongyi Hao,<sup>1</sup> Shuangling Zhong<sup>1</sup> and Wencong Liu<sup>1\*</sup>**

1. College of Resources and Environment, Jilin Agricultural University, Changchun, 130118, P.R China
2. School of Electronic Engineering, University of Electronic Science and Technology of China, Chengdu 611731, P. R. China

E-mail: [qyluo2014@163.com](mailto:qyluo2014@163.com); [chemliuwc@163.com](mailto:chemliuwc@163.com)

## Experimental Section:

### Synthesis of GO:

GO was synthesized from natural graphite powder according to a modified Hummers method. Briefly, 0.9 g of graphite powder was added into a mixture of 7.2 mL of 98%  $\text{H}_2\text{SO}_4$ , 1.5 g of  $\text{K}_2\text{S}_2\text{O}_8$ , and 1.5 g of  $\text{P}_2\text{O}_5$ . The solution was kept at 80 °C for 4.5 h, followed by thorough washing with water. Thereafter, the as-treated graphite was put into a 250 mL beaker, to which 0.5 g of  $\text{NaNO}_3$  and 23 mL of  $\text{H}_2\text{SO}_4$  (98%) were then added while keeping the beaker in the ice bath. Subsequently, 3 g of  $\text{KMnO}_4$  was added slowly. After 5 min, the ice bath was removed and the solution was heated up to and kept at 35 °C under vigorous stirring for 2 h, followed by the slow addition of 46 mL of water. Finally, 40 mL of water and 5 mL of  $\text{H}_2\text{O}_2$  was added, followed by water washing and filtration. The exfoliation of graphene oxide was then dispersed in water (5 mg  $\text{mL}^{-1}$ ) under ultrasonication for 2 h to yield a homogeneous suspension.

### Synthesis of $\text{SnO}_2$ quantum dots:

1 mmol  $\text{SnCl}_4$  and 1 mmol AHA were dissolved in 10 mL water. After ultrasound treatment for 5 minutes, the products were purified by centrifugation and washed with water and acetone for three times.

### Synthesis of $\text{SnO}_2$ /GO hybrids:

The as-obtained  $\text{SnO}_2$  quantum dots were re-dispersed in 10 mL water, then 4 mL GO solution was dropping in slowing. After stirring for 1 hour, the black precipitation was collected by centrifugation and re-dispersed in 10 mL ethanol. After hydrothermal treatment at 140 °C for 3 hours,  $\text{SnO}_2$ /RGO hybrid nanomaterial was obtained.

### Synthesis of $\text{SnO}_2$ /N doped RGO hybrids:

The dried  $\text{SnO}_2$ /RGO sample was heated in Ar flow at 450 °C for 2 hours at a heating rate of 2 °C/min.

### Characterization:

The X-ray diffraction patterns of the products were collected on a Rigaku-D/max 2500 V X-ray diffractometer with  $\text{Cu-K}_\alpha$  radiation ( $\lambda = 1.5418 \text{ \AA}$ ), with an operation voltage and current maintained at 40 kV and 40 mA. Transmission electron microscopic (TEM) images were obtained with a TECNAI G2 high-resolution transmission electron microscope operating at 200 kV. XPS measurement was performed on an ESCALAB-MKII 250 photoelectron spectrometer (VG Co.) with  $\text{Al K}_\alpha$  X-ray radiation as the X-ray source for excitation.

### Electrochemical measurements:

The test cell consisted of a working electrode and a lithium foil which were separated by a Celgard 2400 membrane. The electrolyte solution was prepared by dissolving 1 M  $\text{LiPF}_6$  in EC-DMC (1 : 1 w/w). The working electrodes were prepared by casting slurry containing 80 % active material, 10 % acetylene black and 10 % polyvinylidene fluoride (PVDF) onto a copper foil. After vacuum drying at 80 °C for about 24 h, the electrode disks were punched and weighed. Each electrode has approximately 1–3 mg of active material. Galvanostatic charge–discharge cycling tests were performed using a LAND CT2001A multi-channel battery testing system in the voltage range between 0.01 and 3 V at room temperature.

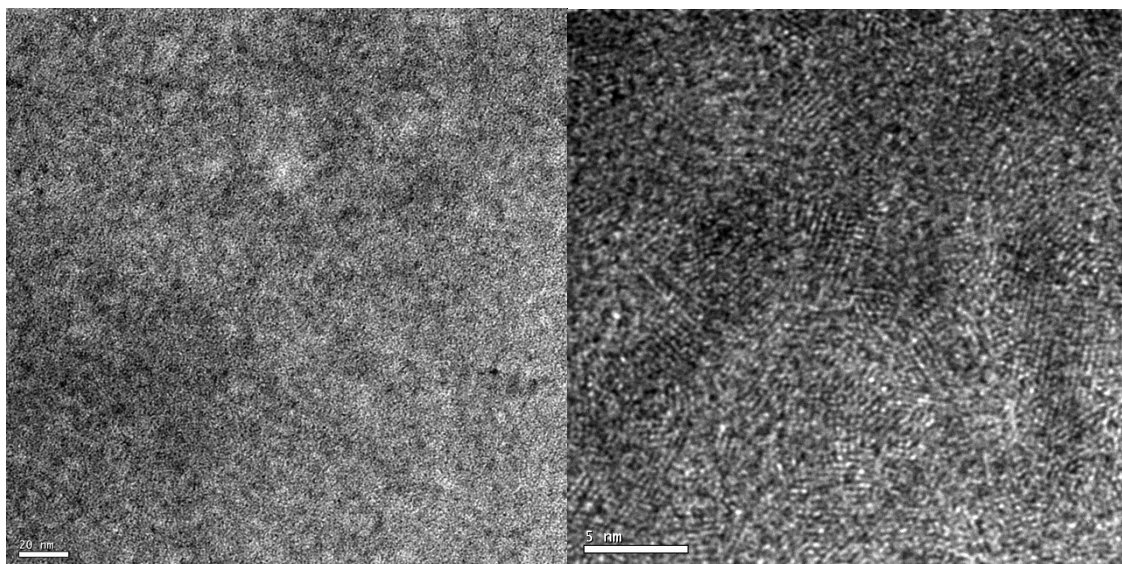

**Figure S1.** TEM images of SnO<sub>2</sub> quantum dots after the ultrasound treatment.

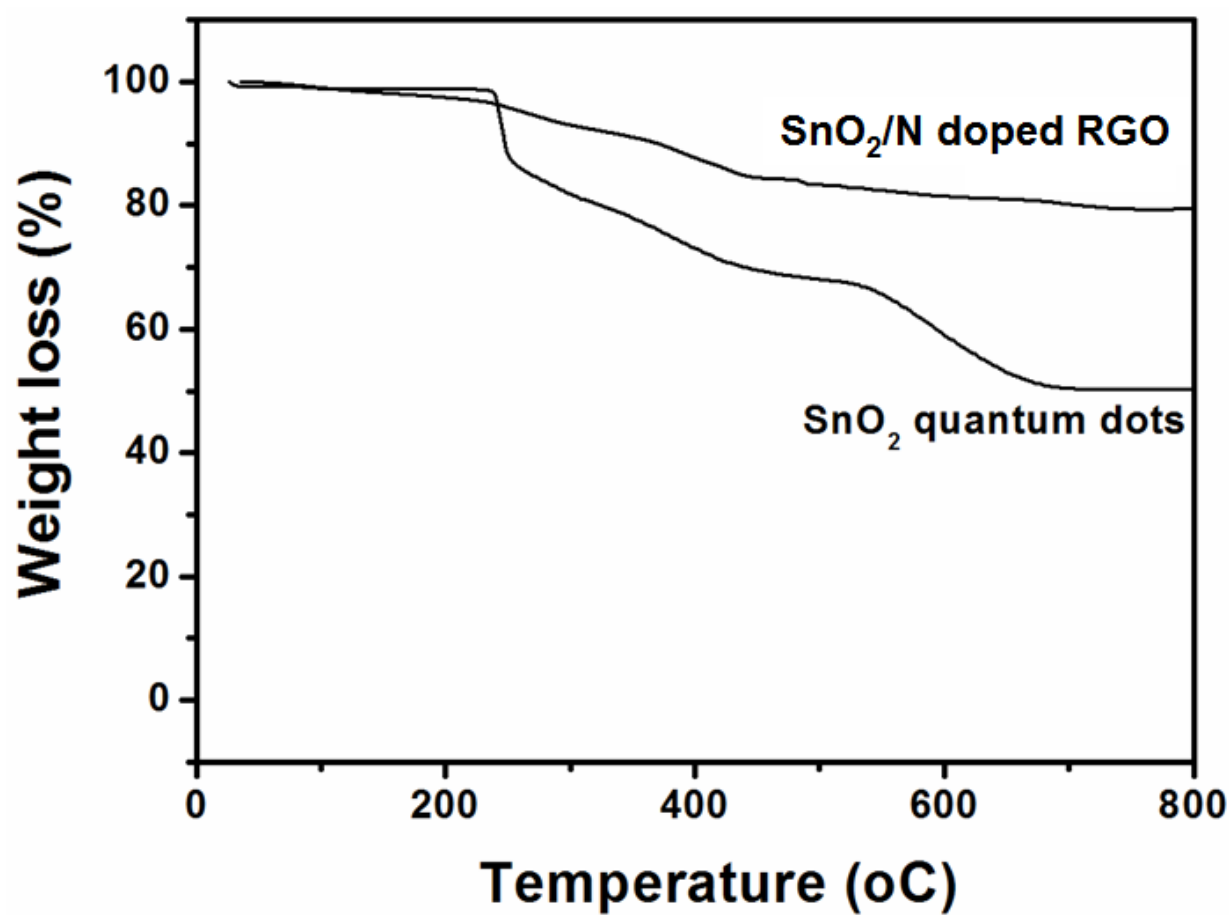

**Figure S2.** TG curves of SnO<sub>2</sub> quantum dots and SnO<sub>2</sub>/N doped RGO.

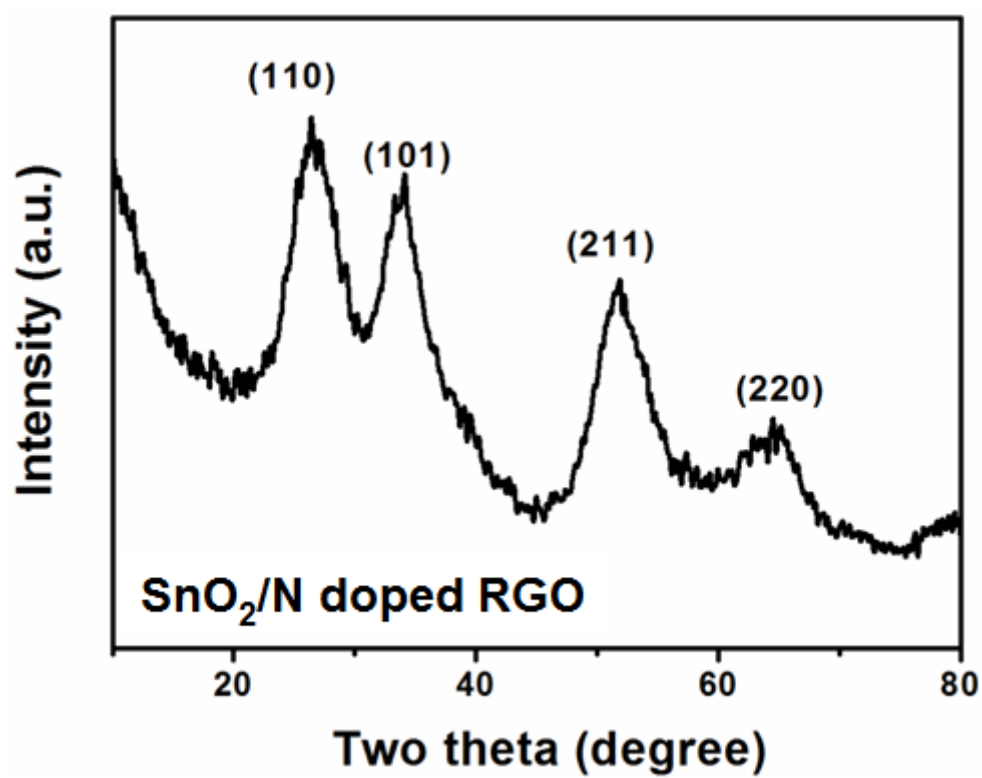

**Figure S3.** XRD data of SnO<sub>2</sub>/N doped RGO.

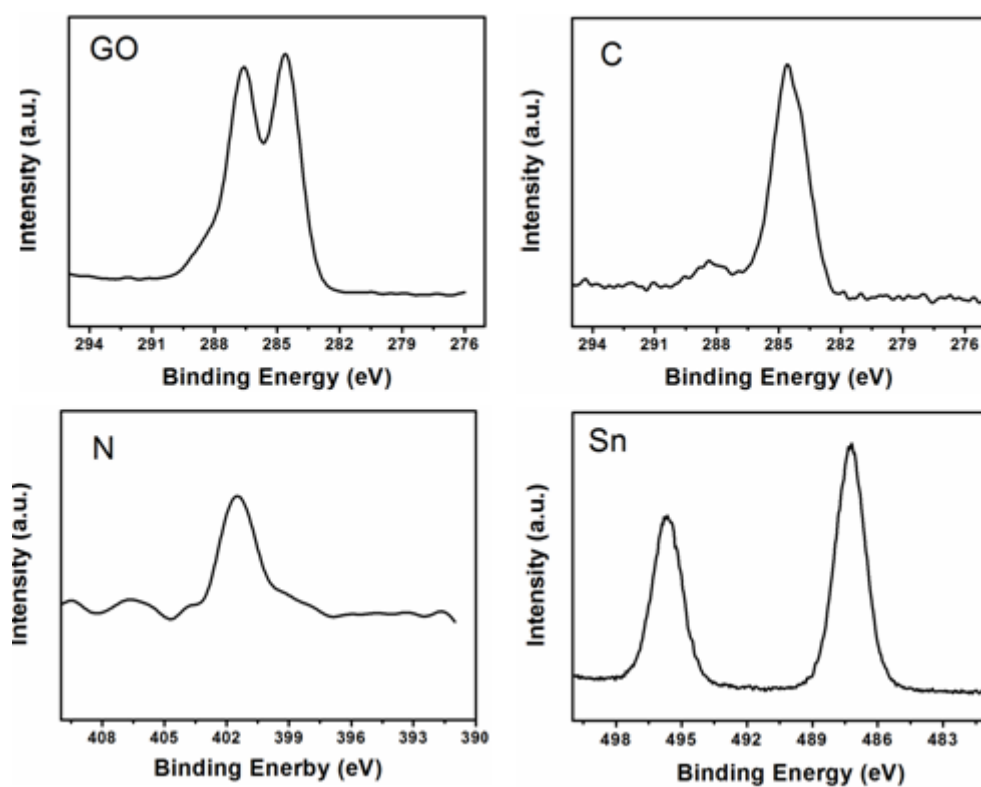

**Figure S4.** XPS data of GO and C, N, Sn in SnO<sub>2</sub>/N doped RGO.

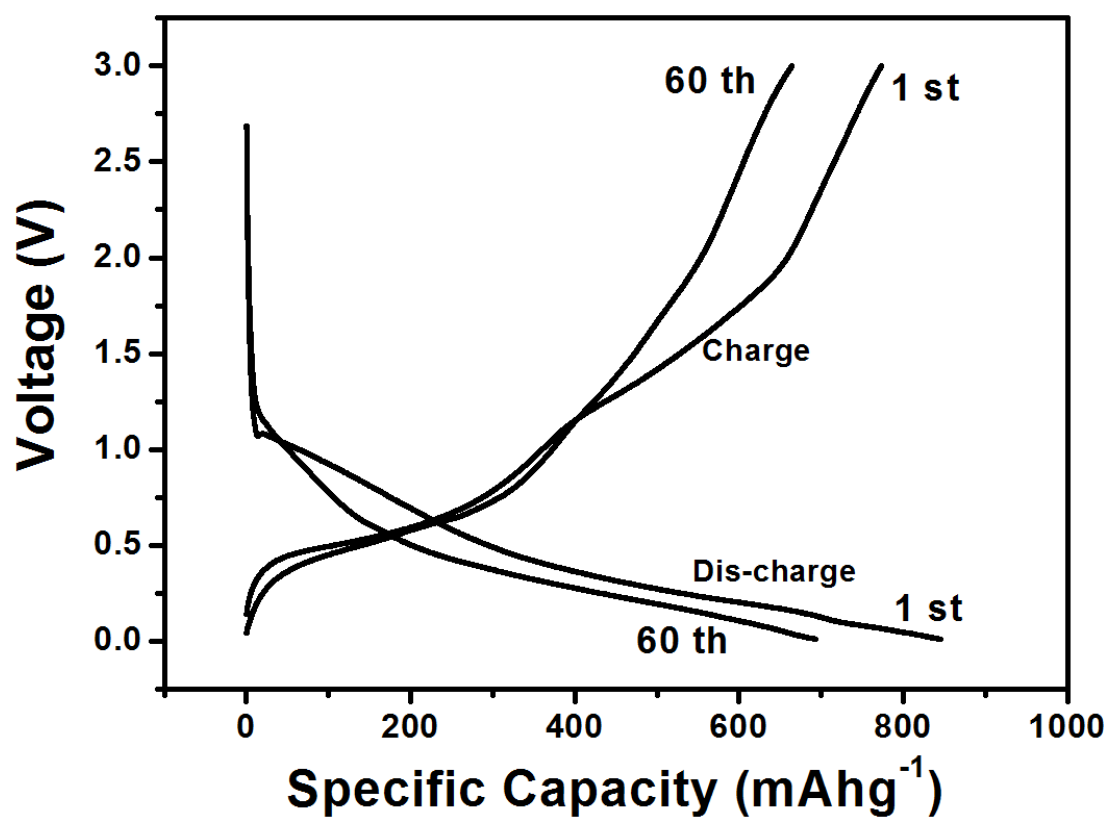

**Figure S5.** discharge-charge curves of SnO<sub>2</sub>/N doped RGO at the ratio of 100 mA g<sup>-1</sup>.

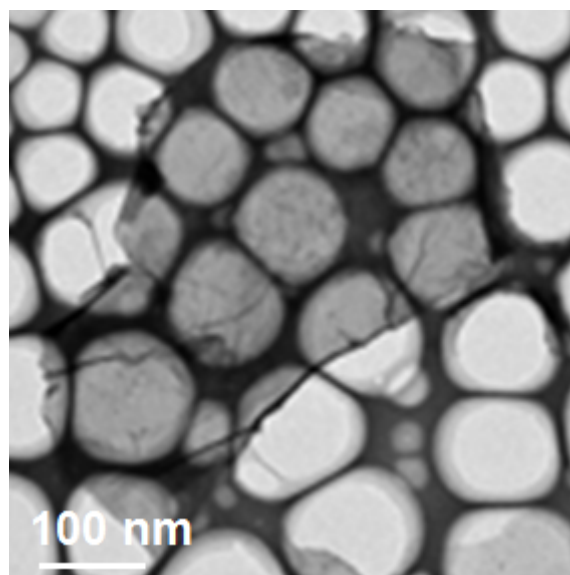

**Figure S6.** TEM image of GO.
